# Supplementary material for: Neocerebellar contributions to social perception in adolescents with autism spectrum disorder
Source: PubMed Central journal article supplement — Dev Cogn Neurosci. 2014 Aug 14;10:77–92. doi: 10.1016/j.dcn.2014.08.001 (PMC6987881; doi:10.1016/j.dcn.2014.08.001), 2014-08-14
Supplement: mmc1.pdf [file mmc1.pdf]

**Table S1**

*Cluster maxima and local peaks identified in supplemental contrasts for neurotypical adolescents*

| Anatomical Region                 | Hem | x   | y   | z   | Z     | k     |
|-----------------------------------|-----|-----|-----|-----|-------|-------|
| <i>IMI &gt; OBS</i>               |     |     |     |     |       |       |
| Inferior parietal lobule          | L   | -46 | -32 | 40  | 10.54 | 47753 |
| Supplementary motor cortex        | --  | -8  | -2  | 54  | 9.61  | --    |
| Central opercular cortex          | L   | -44 | -6  | 8   | 9.61  | --    |
| Cerebellum VI                     | R   | 28  | -50 | -34 | 9.52  | --    |
| <i>OBS &gt; EXE</i>               |     |     |     |     |       |       |
| Inferior lateral occipital cortex | L   | -48 | -80 | 2   | 13.94 | 18319 |
| Posterior STS                     | L   | -50 | -68 | 0   | 12.84 | --    |
| Sup. lateral occipital cortex     | R   | 28  | -84 | 32  | 11.96 | --    |
| Paracingulate gyrus               | --  | -8  | 42  | -8  | 5.47  | 6888  |
| Ventromedial prefrontal cortex    | --  | 8   | 40  | -20 | 5.05  | --    |
| Frontal pole                      | --  | -6  | 56  | -8  | 4.97  | --    |
| Postcentral gyrus                 | R   | 34  | -30 | 56  | 5.81  | 999   |
| Precentral gyrus                  | R   | 30  | -26 | 64  | 5.66  | --    |

**Table S2**

*Cluster maxima and local peaks identified in supplemental contrasts for youth with ASD*

| Anatomical Region                 | Hem | x   | y    | z   | Z    | k     |
|-----------------------------------|-----|-----|------|-----|------|-------|
| <i>IMI &gt; OBS</i>               |     |     |      |     |      |       |
| Inferior parietal lobule          | L   | -46 | -32  | 40  | 7.05 | 6176  |
| Precentral gyrus                  | L   | -32 | -10  | 62  | 6.86 | --    |
| Precentral gyrus                  | R   | 40  | -2   | 36  | 5.62 | --    |
| Superior parietal lobule          | L   | -36 | -50  | 68  | 5.47 | --    |
| Cerebellum VI                     | R   | 30  | -54  | -26 | 6.50 | 2484  |
| Posterior STS                     | R   | 46  | -62  | 2   | 5.21 | --    |
| Cerebellum V                      | R   | 20  | -46  | -28 | 4.98 | --    |
| Inferior lateral occipital cortex | L   | -30 | -90  | 2   | 5.45 | 1868  |
| Occipital pole                    | L   | -22 | -102 | -6  | 4.82 | --    |
| Posterior STS                     | L   | -44 | -72  | 0   | 4.63 | --    |
| Occipital fusiform gyrus          | L   | -38 | -70  | -10 | 4.16 | --    |
| Central opercular cortex          | L   | -50 | 2    | 2   | 4.05 | 1493  |
| Thalamus                          | L   | -18 | -24  | 2   | 3.99 | --    |
| Putamen                           | L   | -28 | -6   | 2   | 3.89 | --    |
| Inferior parietal lobule          | R   | 46  | -28  | 36  | 4.22 | 791   |
| Superior parietal lobule          | R   | 40  | -44  | 54  | 4.15 | --    |
| Anterior intraparietal sulcus     | R   | 40  | -42  | 42  | 3.80 | --    |
| <i>OBS &gt; EXE</i>               |     |     |      |     |      |       |
| Superior lateral occipital cortex | R   | 20  | -78  | 44  | 9.54 | 30270 |
| Posterior STS                     | R   | 42  | -64  | -2  | 8.66 | --    |
| Occipital pole                    | L   | -12 | -100 | 8   | 8.40 | --    |
| Cuneal cortex                     | L   | -18 | -78  | 34  | 8.35 | --    |
| Posterior STS                     | L   | -38 | -80  | 6   | 7.92 | --    |
| Paracingulate gyrus               | --  | -6  | 50   | 0   | 3.70 | 681   |
| Ventromedial prefrontal cortex    | --  | -4  | 32   | -10 | 3.55 | --    |
| Frontal pole                      | L   | -22 | 54   | 28  | 5.15 | 571   |
| Postcentral gyrus                 | L   | -44 | -18  | 34  | 5.05 | 540   |

**Table S3***Significant ASD versus comparison group differences in supplemental contrasts.*

| Anatomical Region                         | Hem | x   | y   | z   | Z    | k    |
|-------------------------------------------|-----|-----|-----|-----|------|------|
| <i>IMI &gt; OBS<sub>TD &gt; ASD</sub></i> |     |     |     |     |      |      |
| Lingual gyrus                             | R   | 12  | -68 | -14 | 4.39 | 6840 |
| Precuneus                                 | R   | 22  | -60 | 28  | 4.32 | --   |
| Cerebellar lobule VIIb                    | R   | 22  | -72 | -48 | 4.32 | --   |
| Cerebellar lobule VI                      | L   | -12 | -64 | -24 | 4.28 | --   |
| Cerebellar vermis VIIa                    | --  | -6  | -64 | -34 | 4.47 | --   |
| Cerebellar vermis VI                      | --  | 4   | -68 | -12 | 4.25 | --   |
| Precentral gyrus                          | L   | -48 | -10 | 48  | 4.92 | 2992 |
| Posterior STS                             | L   | -66 | -16 | 6   | 4.72 | --   |
| Inf. lateral occipital cortex             | L   | -56 | -68 | -2  | 4.30 | --   |
| Ant. supramarginal gyrus                  | L   | -46 | -38 | 36  | 4.02 | --   |
| Insula                                    | R   | 42  | 4   | -8  | 5.23 | 2654 |
| Central operculum                         | R   | 46  | 0   | 6   | 4.16 | --   |
| Precentral gyrus                          | R   | 52  | -10 | 50  | 4.01 | --   |
| Precuneus                                 | --  | 6   | -62 | 52  | 4.62 | 1653 |
| Superior parietal lobule                  | L   | -18 | -56 | 66  | 4.14 | --   |
| Sup. lateral occipital cortex             | R   | 16  | -58 | 60  | 4.08 | --   |
| Parietal operculum                        | R   | 54  | -32 | 32  | 4.30 | 971  |
| Ant. supramarginal gyrus                  | R   | 66  | -20 | 20  | 3.73 | --   |
| Central opercular cortex                  | R   | 68  | -16 | 36  | 3.59 | --   |
| Insula                                    | L   | -38 | -2  | 12  | 4.09 | 876  |
| Temporal pole                             | L   | -58 | 10  | -16 | 3.82 | --   |
| Inferior frontal gyrus, pars op.          | L   | -52 | 14  | 12  | 3.82 | --   |
| Anterior cingulate cortex                 | --  | 6   | -4  | 38  | 4.16 | 582  |
| Lateral orbitofrontal cortex              | L   | -36 | 30  | -4  | 4.19 | 537  |
| Putamen                                   | L   | -22 | 16  | -2  | 3.40 | --   |
| Amygdala                                  | L   | -14 | -6  | -14 | 3.25 | --   |
| <i>OBS &gt; EXE<sub>ASD &gt; TD</sub></i> |     |     |     |     |      |      |
| Cerebellum VI                             | L   | -12 | -60 | -28 | 4.25 | 1402 |
